# Supplementary material for: Oxygen gradient ektacytometry–derived biomarkers are associated with acute complications in sickle cell disease
Source: PubMed Central journal article supplement — Blood Adv. 2023 Nov 20;8(2):276–86. doi: 10.1182/bloodadvances.2023011013 (PMC10824684; doi:10.1182/bloodadvances.2023011013), 2023-11-20
Supplement: BLOODA_ADV-2023-011013-mmc1.pdf [file BLOODA_ADV-2023-011013-mmc1.pdf]

## Supplemental Files

**Supplemental Table 1. Logistic regression model evaluating relation of laboratory parameters with >1 type of acute complication in pediatric and adult cohort combined**

| <b>&gt;1 type of acute complication**</b> |                   |               |                    | <b>Total cohort</b>        |               |                    |
|-------------------------------------------|-------------------|---------------|--------------------|----------------------------|---------------|--------------------|
| <b>Laboratory parameters</b>              | <b>Odds ratio</b> |               |                    | <b>Adjusted odds ratio</b> |               |                    |
|                                           | <b>OR</b>         | <b>95% CI</b> | <b>P-value</b>     | <b>aOR</b>                 | <b>95% CI</b> | <b>P-value</b>     |
| PoS (10 mmHg ↑)                           | 1.60              | 1.22 – 2.11   | <b>0.001*</b>      | 1.77                       | 1.32 – 2.37   | <b>&lt;0.0001*</b> |
| El <sub>min</sub> (0.1 EI ↑)              | 0.44              | 0.31 – 0.65   | <b>&lt;0.0001*</b> | 0.43                       | 0.31 – 0.65   | <b>&lt;0.0001*</b> |
| El <sub>max</sub> (0.1 EI ↑)              | 0.62              | 0.45 – 0.85   | <b>0.002*</b>      | 0.58                       | 0.43 – 0.80   | <b>0.001*</b>      |
| Blood viscosity (1.0 cP ↑) <sup>‡</sup>   | n/a               | n/a           | n/a                | n/a                        | n/a           | n/a                |
| HVR                                       | n/a               | n/a           | n/a                | n/a                        | n/a           | n/a                |
| Hb (1.0 g/dL ↑)                           | 0.98              | 0.79 – 1.21   | 0.821              | 0.98                       | 0.79 – 1.22   | 0.885              |
| HbF (10.0% ↑) <sup>†</sup>                | 0.56              | 0.37 – 0.87   | <b>0.009*</b>      | 0.50                       | 0.31 – 0.82   | <b>0.005*</b>      |
| MCV (10 fl ↑)                             | 1.07              | 0.86 – 1.33   | 0.550              | 1.00                       | 0.82 – 1.32   | 0.705              |
| MCHC (1.0 g/dL ↑)                         | 1.03              | 0.86 – 1.23   | 0.781              | 1.05                       | 0.87 – 1.28   | 0.602              |
| MCH (pg)                                  | 0.99              | 0.94 – 1.05   | 0.808              | 0.98                       | 0.93 – 1.05   | 0.588              |
| ARC (100 x10 <sup>9</sup> /L ↑)           | 1.27              | 0.999 – 1.61  | 0.051              | 1.26                       | 0.98 – 1.62   | 0.076              |
| Dense RBCs (1.0% ↑)                       | n/a               | n/a           | n/a                | n/a                        | n/a           | n/a                |

**Supplemental Table 2. Logistic regression model evaluating relation of laboratory parameters with vaso-occlusive episode in pediatric and adult cohort combined**

| <b>Vaso-occlusive episode</b>           |                   |               |                    | <b>Total cohort</b>        |               |                   |
|-----------------------------------------|-------------------|---------------|--------------------|----------------------------|---------------|-------------------|
| <b>Laboratory parameters</b>            | <b>Odds ratio</b> |               |                    | <b>Adjusted odds ratio</b> |               |                   |
|                                         | <b>OR</b>         | <b>95% CI</b> | <b>P-value</b>     | <b>aOR</b>                 | <b>95% CI</b> | <b>P-value</b>    |
| PoS (10 mmHg ↑)                         | 1.57              | 1.20 – 2.05   | <b>&lt;0.001*</b>  | 1.57                       | 1.20 – 2.05   | <b>0.001*</b>     |
| El <sub>min</sub> (0.1 EI ↑)            | 0.58              | 0.43 – 0.80   | <b>&lt;0.001*</b>  | 0.58                       | 0.43 – 0.80   | <b>&lt;0.001*</b> |
| El <sub>max</sub> (0.1 EI ↑)            | 0.68              | 0.49 – 0.93   | <b>0.013*</b>      | 0.68                       | 0.49 – 0.93   | <b>0.015*</b>     |
| Blood viscosity (1.0 cP ↑) <sup>‡</sup> | n/a               | n/a           | n/a                | n/a                        | n/a           | n/a               |
| HVR                                     | n/a               | n/a           | n/a                | n/a                        | n/a           | n/a               |
| Hb (1.0 g/dL ↑)                         | 1.00              | 0.82 – 1.22   | 0.991              | 0.99                       | 0.82 – 1.21   | 0.949             |
| HbF (10.0% ↑) <sup>†</sup>              | 0.42              | 0.27 – 0.64   | <b>&lt;0.0001*</b> | 0.41                       | 0.26 – 0.64   | <b>0.0001*</b>    |
| MCV (10 fl ↑)                           | 0.92              | 0.76 – 1.12   | 0.452              | 0.93                       | 0.77 – 1.13   | 0.513             |
| MCHC (1.0 g/dL ↑)                       | 1.10              | 0.93 – 1.31   | 0.253              | 1.10                       | 0.92 – 1.31   | 0.292             |
| MCH (10.0 pg ↑)                         | 0.61              | 0.35 – 1.08   | 0.086              | 0.61                       | 0.34 – 1.10   | 0.100             |
| ARC (100 x10 <sup>9</sup> /L ↑)         | 1.22              | 1.00 – 1.49   | <b>0.035</b>       | 1.22                       | 1.00 – 1.49   | <b>0.028</b>      |
| Dense RBCs (1.0% ↑)                     | n/a               | n/a           | n/a                | n/a                        | n/a           | n/a               |

**Supplemental Table 3. Logistic regression model evaluating relation of laboratory parameters with acute chest syndrome in pediatric and adult cohort combined**

| Acute Chest Syndrome                    | Total cohort |              |                    |                     |             |                     |
|-----------------------------------------|--------------|--------------|--------------------|---------------------|-------------|---------------------|
|                                         | Odds ratio   |              |                    | Adjusted odds ratio |             |                     |
| Laboratory parameters                   | OR           | 95% CI       | P-value            | OR                  | 95% CI      | P-value             |
| PoS (10 mmHg ↑)                         | 1.28         | 0.995 – 1.66 | 0.051              | 1.63                | 1.22 – 2.19 | <b>0.001*</b>       |
| El <sub>min</sub> (0.1 EI ↑)            | 0.52         | 0.38 – 0.71  | <b>&lt;0.0001*</b> | 0.46                | 0.33 – 0.64 | <b>&lt;0.00001*</b> |
| El <sub>max</sub> (0.1 EI ↑)            | 0.73         | 0.54 – 0.97  | <b>0.037</b>       | 0.61                | 0.44 – 0.85 | <b>0.003*</b>       |
| Blood viscosity (1.0 cP ↑) <sup>‡</sup> | n/a          | n/a          | n/a                | n/a                 | n/a         | n/a                 |
| HVR                                     | n/a          | n/a          | n/a                | n/a                 | n/a         | n/a                 |
| Hb (1.0 g/dL ↑)                         | 0.97         | 0.80 – 1.17  | 0.723              | 1.01                | 0.83 – 1.23 | 0.919               |
| HbF (10.0% ↑) <sup>†</sup>              | 0.76         | 0.52 – 1.10  | 0.135              | 0.58                | 0.38 – 0.90 | <b>0.016*</b>       |
| MCV (10 fl ↑)                           | 1.13         | 0.93 – 1.37  | 0.205              | 1.08                | 0.89 – 1.32 | 0.451               |
| MCHC (1.0 g/dL ↑)                       | 0.90         | 0.76 – 1.07  | 0.224              | 0.99                | 0.83 – 1.20 | 0.948               |
| MCH (10.0 pg ↑)                         | 1.02         | 0.59 – 1.77  | 0.951              | 0.85                | 0.47 – 1.53 | 0.603               |
| ARC (100 x10 <sup>9</sup> /L ↑)         | 1.25         | 1.02 – 1.52  | <b>0.014</b>       | 1.19                | 0.98 – 1.45 | 0.057               |
| Dense RBCs (1.0% ↑)                     | n/a          | n/a          | n/a                | n/a                 | n/a         | n/a                 |

**Supplemental Table 4. Logistic regression model evaluating relation of laboratory parameters with cerebral infarction in pediatric and adult cohort combined**

| Cerebral infarction                     | Total cohort |             |                |                     |             |                |
|-----------------------------------------|--------------|-------------|----------------|---------------------|-------------|----------------|
|                                         | Odds ratio   |             |                | Adjusted odds ratio |             |                |
| Laboratory parameters                   | OR           | 95% CI      | P-value        | OR                  | 95% CI      | P-value        |
| PoS (10 mmHg ↑)                         | 1.63         | 1.06 – 2.51 | <b>0.027</b>   | 1.60                | 0.99 – 2.56 | 0.056          |
| El <sub>min</sub> (0.1 EI ↑)            | 0.35         | 0.16 – 0.73 | <b>0.005*</b>  | 0.34                | 0.16 – 0.73 | <b>0.006*</b>  |
| El <sub>max</sub> (0.1 EI ↑)            | 0.41         | 0.24 – 0.68 | <b>0.0005*</b> | 0.41                | 0.24 – 0.69 | <b>0.0009*</b> |
| Blood viscosity (1.0 cP ↑) <sup>‡</sup> | n/a          | n/a         | n/a            | n/a                 | n/a         | n/a            |
| HVR                                     | n/a          | n/a         | n/a            | n/a                 | n/a         | n/a            |
| Hb (1.0 g/dL ↑)                         | 1.06         | 0.74 – 1.53 | 0.758          | 1.02                | 0.70 – 1.48 | 0.922          |
| HbF (10.0% ↑) <sup>†</sup>              | 0.61         | 0.28 – 1.33 | 0.217          | 0.71                | 0.31 – 1.62 | 0.428          |
| MCV (10 fl ↑)                           | 1.15         | 0.79 – 1.67 | 0.461          | 1.17                | 0.82 – 1.67 | 0.381          |
| MCHC (1.0 g/dL ↑)                       | 0.96         | 0.71 – 1.30 | 0.807          | 0.89                | 0.67 – 1.19 | 0.437          |
| MCH (10.0 pg ↑)                         | 0.91         | 0.32 – 2.58 | 0.870          | 0.97                | 0.34 – 2.80 | 0.952          |
| ARC (100 x10 <sup>9</sup> /L ↑)         | 1.02         | 0.89 – 1.65 | 0.220          | 1.32                | 0.95 – 1.84 | 0.093          |
| Dense RBCs (1.0% ↑)                     | n/a          | n/a         | n/a            | n/a                 | n/a         | n/a            |

**Supplemental Table 15. Correlations of oxygen gradient ektacytometry-derived biomarkers with laboratory parameters**

| Laboratory parameters | Adult cohort       |                    |                     | Pediatric cohort    |                     |                     |
|-----------------------|--------------------|--------------------|---------------------|---------------------|---------------------|---------------------|
|                       | PoS                | El <sub>min</sub>  | El <sub>max</sub>   | PoS                 | El <sub>min</sub>   | El <sub>max</sub>   |
| Hemoglobin (g/dL)     | $r = -0.09$        | $r = 0.08$         | $r = 0.24$          | $r = -0.48\ddagger$ | $r = 0.54\ddagger$  | $r = 0.62\ddagger$  |
| HbF (%)               | $r = -0.50^{\S}$   | $r = 0.63\ddagger$ | $r = 0.65\ddagger$  | $r = -0.70\ddagger$ | $r = 0.81\ddagger$  | $r = 0.79\ddagger$  |
| MCV (fL)              | $r = -0.12$        | $r = 0.43\ddagger$ | $r = 0.29^*$        | $r = 0.05$          | $r = -0.05$         | $r = 0.00$          |
| MCHC (g/dL)           | $r = 0.02$         | $r = 0.08$         | $r = 0.04$          | $r = 0.16^*$        | $r = -0.20\ddagger$ | $r = -0.19^*$       |
| MCH (pg)              | $r = -0.09$        | $r = 0.34^*$       | $r = 0.29^*$        | $r = 0.00$          | $r = -0.02$         | $r = 0.04$          |
| Dense RBC (%)         | <i>n/a</i>         | <i>n/a</i>         | <i>n/a</i>          | $r = 0.65\ddagger$  | $r = -0.73\ddagger$ | $r = -0.80\ddagger$ |
| ARC (10.9/L)          | $r = 0.41\ddagger$ | $r = -0.51^{\S}$   | $r = -0.63\ddagger$ | $r = 0.35\ddagger$  | $r = -0.44\ddagger$ | $r = -0.47\ddagger$ |
| WBC (10.9/L)          | $r = 0.34^*$       | $r = -0.47^{\S}$   | $r = -0.54\ddagger$ | $r = 0.24\ddagger$  | $r = -0.31\ddagger$ | $r = -0.42\ddagger$ |
| TCD Left MCA          | <i>n/a</i>         | <i>n/a</i>         | <i>n/a</i>          | $r = 0.27\ddagger$  | $r = -0.34^{\S}$    | $r = -0.32^{\S}$    |
| TCD Right MCA         | <i>n/a</i>         | <i>n/a</i>         | <i>n/a</i>          | $r = 0.31^{\S}$     | $r = -0.30\ddagger$ | $r = -0.40^*$       |

**Supplemental Table 5. Correlations of oxygen gradient ektacytometry-derived biomarkers with laboratory parameters and TCD values.**  $\ddagger p < 0.0001$ ,  $\S p < 0.001$ ,  $\ddagger p < 0.01$ ,  $* p < 0.05$ . PoS, point of sickling; El<sub>min</sub>, minimum deformability; El<sub>max</sub>, maximum deformability; HbF, fetal hemoglobin; MCV, mean corpuscular volume; MCHC, mean corpuscular hemoglobin concentration; MCH, mean corpuscular hemoglobin; RBC, red blood cell; ARC, absolute reticulocyte count; WBC, white blood cell; TCD, trans cranial Doppler; MCA, media cerebral artery; *n/a*, not addressed;

**Supplemental Table 6. Intra patient variability**

| PoS               | Mean CV | SD CV |
|-------------------|---------|-------|
| No therapy (n=6)  | 5.1%    | 6.9%  |
| Hydroxyurea (n=5) | 7.8%    | 6.0%  |
| All (n=11)        | 6.3%    | 6.4%  |

**Supplemental Table 6. Intra patient variability of PoS measured at two or three different time points.**

PoS, point of sickling; CV, coefficient of variance; SD, standard deviation
